# Supplementary material
Source: MDPI journal article supplement (https://www.mdpi.com/2073-4352/10/11/1011)
Supplement: s1 [file s1]

### Supporting Information

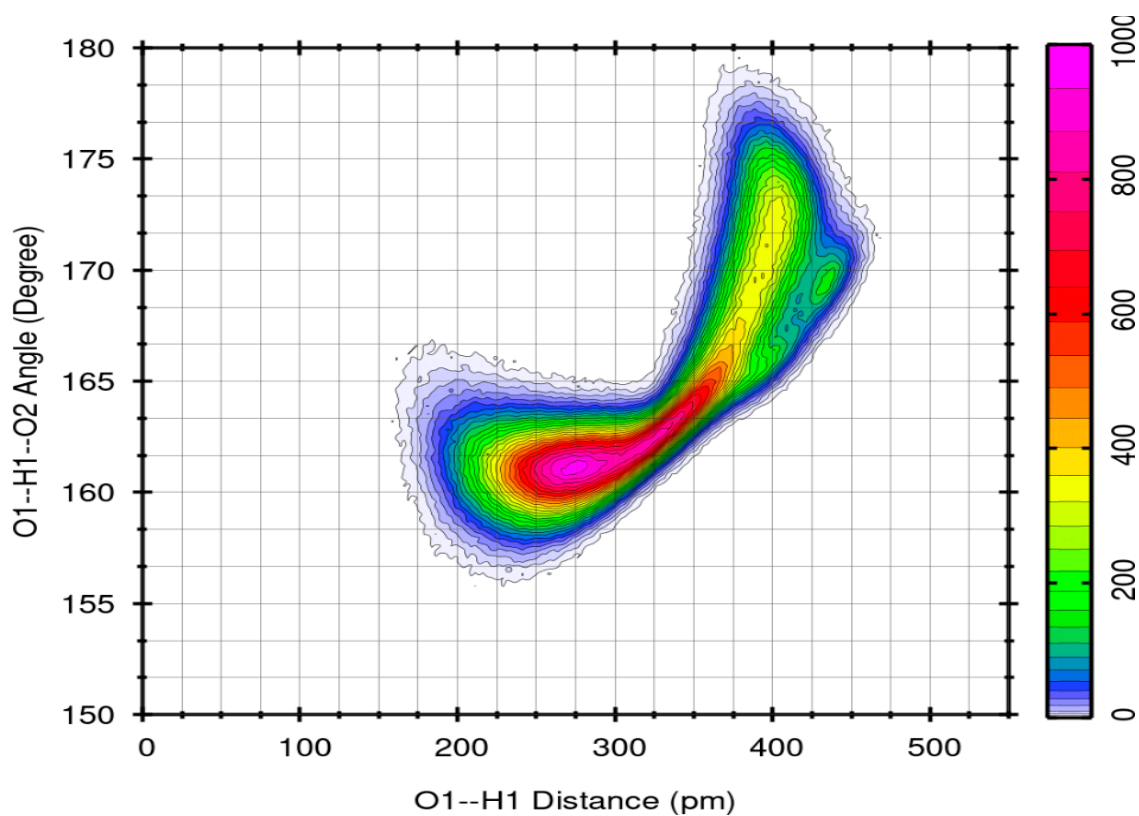

**Figure S1.** ME: Combined radial and angular distribution function for intramolecular H-bond.

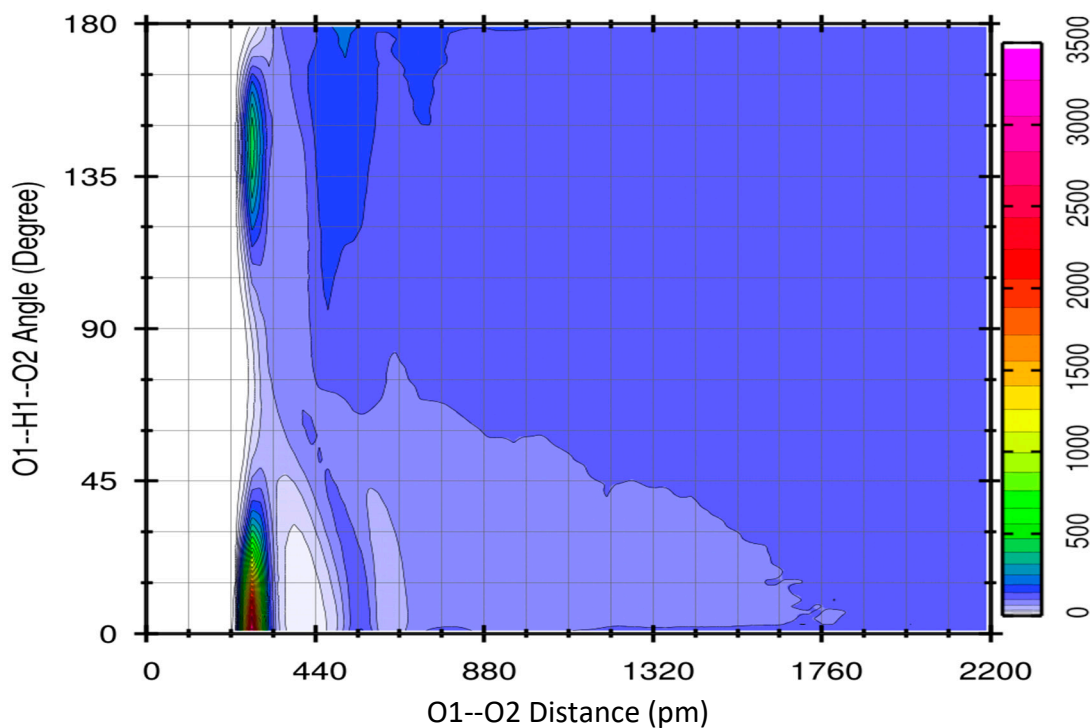

**Figure S2.** EG: Combined radial and angular distribution function for intermolecular H-bond
